# Supplementary material for: Home-based functional walking program for advanced cancer patients receiving palliative care: a case series
Source: PubMed Central journal article supplement (PMC3655875; doi:10.1186/1472-684x-12-22), 2013-05-11
Supplement: 1472-684X-12-22-S1.pdf [file 1472-684X-12-22-S1.pdf]

## Appendix 1: Modified home-based functional walking (FW) program

| Exercise                                 | Purpose                              | Target muscle / joint                            | Examples of equipment                          | Position            |
|------------------------------------------|--------------------------------------|--------------------------------------------------|------------------------------------------------|---------------------|
| 1. Chin to chest                         | Range of motion                      | Cervical spine                                   | None                                           | Seated              |
| 2. Chin to shoulder                      | Range of motion                      | Cervical spine                                   | None                                           | Seated              |
| 3. Shoulder shrugs                       | Range of motion                      | Shoulder joint                                   | None                                           | Seated              |
| 4. Arm swing                             | Range of motion                      | Shoulder joint                                   | None                                           | Seated              |
| 5. Rowing                                | Range of motion                      | Shoulder and elbow joints                        | None                                           | Seated              |
| 6. Forward hugs                          | Range of motion                      | Lower back and upper arms                        | None                                           | Seated              |
| 7. Up and down leg march                 | Range of motion                      | Hip joint                                        | None                                           | Seated or standing  |
| 8. Out and in leg march                  | Range of motion                      | Hip joint                                        | None                                           | Seated or standing  |
| 9. Foot forward and backward             | Range of motion                      | Knee joint                                       | None                                           | Seated or standing  |
| 10. Toe point/flex and Wrist flex/extend | Range of motion                      | Ankle and wrist joints                           | None                                           | Seated              |
| 11. Ball squeeze                         | Resistance training<br>Grip strength | Wrist and forearm muscles                        | Thera-band <sup>®</sup> hand exercisers        | Seated              |
| 12. Chest press                          | Resistance training                  | Pectoralis major, triceps and deltoids           | Thera-bands <sup>®</sup>                       | Seated              |
| 13. Rowing                               | Resistance training                  | Latissimus dorsi, trapezius, biceps and deltoids | Thera-bands <sup>®</sup>                       | Seated              |
| 14. Biceps curl                          | Resistance training                  | Biceps                                           | Neoprene dumbbells                             | Seated              |
| 15. Triceps curl                         | Resistance training                  | Triceps                                          | Thera-bands <sup>®</sup> or neoprene dumbbells | Seated              |
| 16. Sit to stand                         | Resistance training                  | Quadriceps, hamstrings and gluteals              | None                                           | Seated and standing |
| 17. Knee flexion                         | Resistance training                  | Hamstrings                                       | Ankle cuff weights                             | Seated or standing  |
| 18. Toe raises                           | Balance retraining                   | Tibialis anterior                                | None                                           | Standing            |
| 19. Heel raises                          | Balance retraining                   | Gastrocnemius and soleus                         | None                                           | Standing            |
| 20. Swan                                 | Stretching                           | Pectoralis major, deltoids and biceps            | None                                           | Seated              |
| 21. Zipper stretch                       | Stretching<br>Flexibility            | Latissimus dorsi and triceps                     | Thera-bands <sup>®</sup>                       | Seated or standing  |
| 22. Tibia touch                          | Stretching<br>Flexibility            | Hamstrings and spinal erectors                   | None                                           | Seated              |
| 23. Outer thigh stretch                  | Stretching                           | Hip abductors                                    | None                                           | Seated              |
| 24. Quadriceps stretch                   | Stretching                           | Quadriceps and tibialis anterior                 | None                                           | Seated or standing  |
| 25. Calf stretch                         | Stretching                           | Gastrocnemius and soleus                         | None                                           | Seated or standing  |
