# Supplementary material for: Home-based functional walking program for advanced cancer patients receiving palliative care: a case series
Source: PubMed Central journal article supplement (PMC3655875; doi:10.1186/1472-684x-12-22), 2013-05-11
Supplement: 1472-684X-12-22-S2.pdf [file 1472-684X-12-22-S2.pdf]

## **Appendix 2: Guidelines for the modified home-based functional walking (FW) program**

| <b>Program Components</b>      | <b>General Guidelines</b>                                                                                                                                                                                                                                                                                                                                                                                                                                                                                                                                                                                                                                                                  |
|--------------------------------|--------------------------------------------------------------------------------------------------------------------------------------------------------------------------------------------------------------------------------------------------------------------------------------------------------------------------------------------------------------------------------------------------------------------------------------------------------------------------------------------------------------------------------------------------------------------------------------------------------------------------------------------------------------------------------------------|
| <b>1. Muscle strengthening</b> | <p>Whole body resistance training with special emphasis on lower body muscle strengthening for transferring, standing, walking and prevention of falls</p> <p>Balanced resistance training of opposing muscle groups:</p> <ul style="list-style-type: none"><li>- Chest/back muscles</li><li>- Biceps/triceps</li><li>- Quadriceps/hamstrings</li><li>- Tibialis anterior/gastrocnemius and soleus</li></ul> <p>Maintenance of proper technique, breathing and positioning on range of motion prior to use of resistance equipment</p>                                                                                                                                                     |
| <b>2. Balance retraining</b>   | <p>Whole body balance training with special emphasis on ankle dorsiflexors and plantar flexors for recovery of balance</p> <p>Maintenance of posture and balance using body weight alone prior to adding resistance equipment</p>                                                                                                                                                                                                                                                                                                                                                                                                                                                          |
| <b>3. Intensity</b>            | <p>Goal of low to moderate intensity measured using Borg's ratings of perceived exertion (RPE) (0-10)</p>                                                                                                                                                                                                                                                                                                                                                                                                                                                                                                                                                                                  |
| <b>4. Resistance</b>           | <p>Progression by:</p> <ul style="list-style-type: none"><li>• Supported to unsupported positions</li><li>• Range of motion or body weight to addition of resistance equipment</li><li>• Start with the lightest resistance equipment and upwards</li><li>• Increasing number of sets/repetitions prior to progression of resistance level</li></ul> <p>Reduce workload if:</p> <ul style="list-style-type: none"><li>• Increased pain, fatigue or shortness of breath post exercise</li><li>• Muscle pain or soreness &gt; 48 hours</li></ul> <p>Terminate session if:</p> <ul style="list-style-type: none"><li>• Excessive pain, fatigue or shortness of breath post exercise</li></ul> |
| <b>5. Sets</b>                 | <p>Progression by:</p> <ul style="list-style-type: none"><li>• Start with one set of 8 repetitions per exercise</li><li>• RPE <math>\leq</math> 3 consistent for <math>\geq</math> 2 sessions prior to increasing number of repetitions by 2 until maximum of 15 repetitions per set</li><li>• Once one set of 15 repetitions achieved, advanced to two sets of 8 repetitions</li></ul>                                                                                                                                                                                                                                                                                                    |
| <b>6. Frequency</b>            | <p>3 days per week, on non-consecutive days</p>                                                                                                                                                                                                                                                                                                                                                                                                                                                                                                                                                                                                                                            |
