# Supplementary material for: Home-based functional walking program for advanced cancer patients receiving palliative care: a case series
Source: PubMed Central journal article supplement (PMC3655875; doi:10.1186/1472-684x-12-22), 2013-05-11
Supplement: 1472-684X-12-22-S3.pdf [file 1472-684X-12-22-S3.pdf]

**Appendix 3: Objective Physical Function Measures (listed in the order of testing)**

| <b>Physical Function Test</b> | <b>Purpose</b>              | <b>General Description</b>                                                                                                                                      |
|-------------------------------|-----------------------------|-----------------------------------------------------------------------------------------------------------------------------------------------------------------|
| 1. 8-Foot up-and-go           | Agility and dynamic balance | Number of seconds required to get up from a seated position, walk 8 feet, turn and return to a seated position                                                  |
| 2. Chair sit-and-reach        | Lower body flexibility      | Number of centimeters between extended fingers and tip of toe, when leg extended and hands reaching towards toes from a seated position at the front of a chair |
| 3. Arm curl                   | Upper body strength         | Number of bicep curls completed in 30 seconds holding a hand weight (5 lbs for women, 8 lbs for men)                                                            |
| 4. Back scratch               | Upper body flexibility      | Number of centimeters between extended middle fingers, when one hand is reaching over the shoulder and the opposite hand up the middle of the back              |
| 5. Grip strength              | Hand and forearm strength   | Number of kilogram-feet measured on handheld dynamometer (average of 2 measurements per side)                                                                   |
| 6. 30 second chair stand      | Lower body strength         | Number of full stands completed in 30 seconds from a seated position                                                                                            |
| 7. Four test balance scale    | Static balance              | Number of seconds up to 10 seconds each that participant is able to sustain 1) feet together stand, 2) semi-tandem stand, 3) tandem stand and 4) one leg stand  |
| 8. 6-minute walk              | Aerobic endurance           | Number of meters that participant can walk in 6 minutes around a 45.7 meter course                                                                              |
